# Supplementary material for: Microphase-separation-induced polyzwitterionic ionogel with tough, highly conductive, self-healing and shape–memory properties for wearable electrical devices
Source: Royal Society of Chemistry journal article supplement (doi:10.1039/d4ta04228j), 2024-01-01
Supplement: d4ta04228j2.pdf [file d4ta04228j2.pdf]

## Supporting Information

### Microphase separation induced polyelectrolyte ionogel with tough, highly conductive, self-healing and shape-memory properties for wearable electrical devices

Guang Zeng<sup>b</sup>, Wenshuo Gao<sup>a</sup>, Weicheng Qiu<sup>a</sup>, Guanling Li<sup>a</sup>, Shousen Chen<sup>a</sup>, Xin He<sup>a</sup>,  
Guoxing Sun<sup>c</sup>, Weijia Yang<sup>a</sup>, Yue Xin<sup>a,\*</sup>

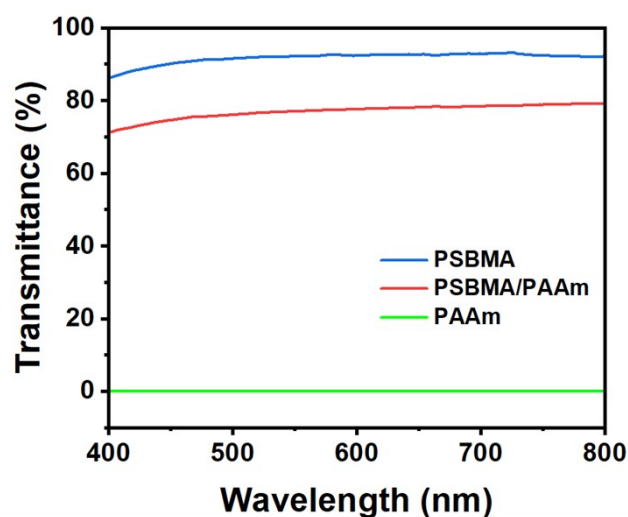

Figure S1 UV-vis spectra of the PSBMA, PSBMA/PAAm and PAAm ionogels.

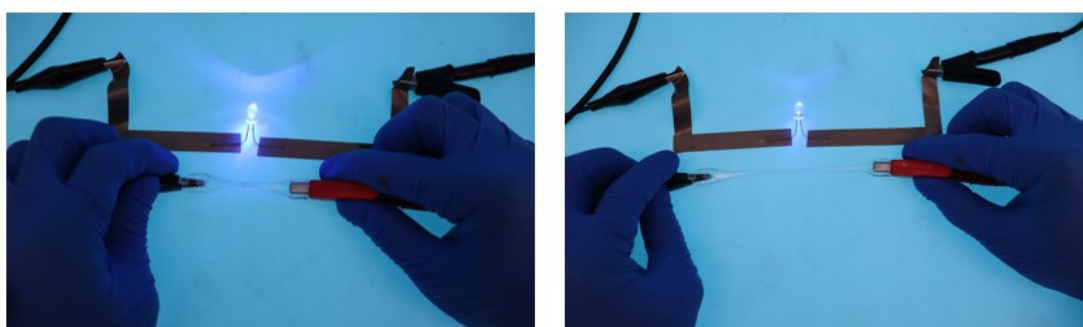

Figure S2 Photographs of the conductive behavior of a dumbbell-shaped PSBMA/PAAm ionogel.

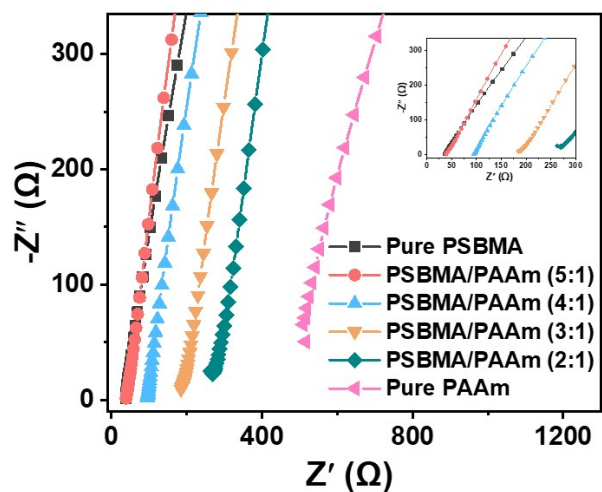

Figure S3 EIS plots of the ionogels in the frequency range of 1 MHz to 0.1 Hz.

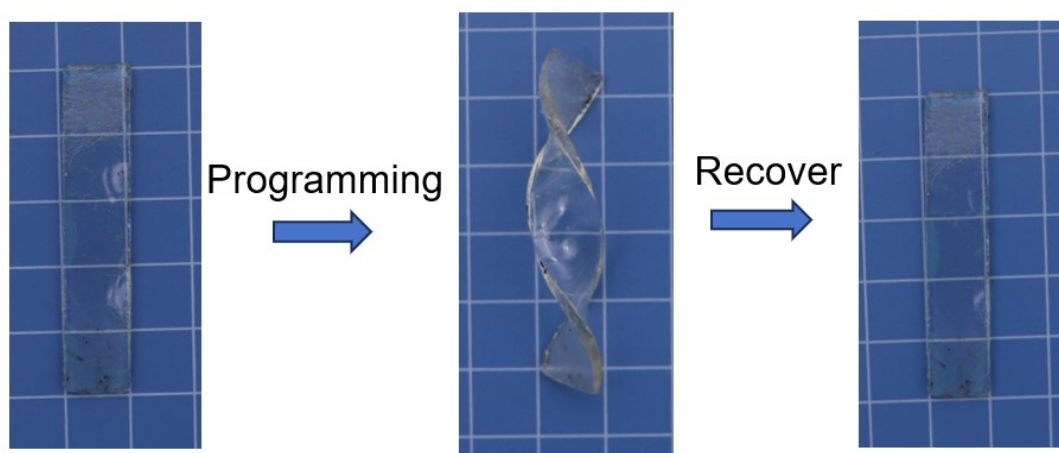

Figure S4 Heating-induced shape-memory behavior of a spiral shape.

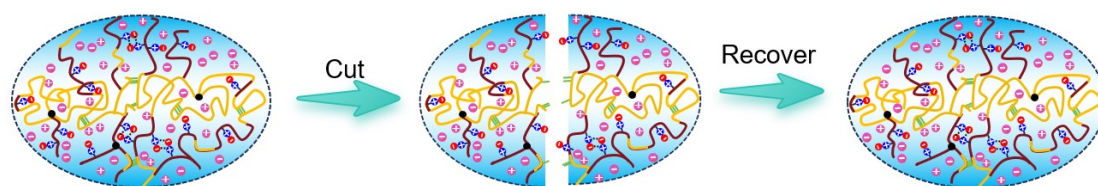

Figure S5 Schematic illustration of the self-healing mechanism of the PSBMA/PAAm ionogel.

Table S1: The exact compositions of the ionogels.

|       | SBMA (g) | AAm (g) | MBA (mg) | 2959 (mg) | EMIES (ml) |
|-------|----------|---------|----------|-----------|------------|
| PSBMA | 3        | 0       | 1.7      | 2.4       | 5          |

|                  |      |      |     |     |   |
|------------------|------|------|-----|-----|---|
| PSBMA/PAAm (5:1) | 2.5  | 0.5  | 1.4 | 3.6 | 5 |
| PSBMA/PAAm (4:1) | 2.4  | 0.6  | 2.6 | 3.8 | 5 |
| PSBMA/PAAm (3:1) | 2.25 | 0.75 | 2.9 | 4.2 | 5 |
| PSBMA/PAAm (2:1) | 2    | 1    | 3.3 | 4.8 | 5 |
| PAAm             | 0    | 3    | 6.5 | 9.5 | 5 |

Table S2 Comparison of this work to reported ionogels on various parameters

| Materials           | Stress (MPa) | Strain (%) | Conductivity (mS/cm)  | Transparency | Self-healing | Shape-memory | Ref.                                                         |
|---------------------|--------------|------------|-----------------------|--------------|--------------|--------------|--------------------------------------------------------------|
| P(AA-co-MEA)        | 0.29         | 500        | 3.4                   | opaque       | no           | no           | <i>Macromolecules</i> 2022, 55, 24, 10950-10959              |
| P(DMAAm-r-AAc)      | 0.32         | 400        | 1.2                   | transparent  | yes          | no           | <i>Adv. Mater.</i> 2018, 1802792                             |
| PVC organic-ionogel | 184          | 364        | 1.17*10 <sup>-3</sup> | opaque       | no           | no           | <i>Nano Energy</i> 113 (2023) 108535                         |
| SIGE                | 2.46         | 169        | 1.2*10 <sup>-4</sup>  | transparent  | no           | no           | <i>Adv. Energy Mater.</i> 2019, 1900257                      |
| PACMO               | 1            | 1000       | 1*10 <sup>-4</sup>    | transparent  | yes          | no           | <i>Adv. Funct. Mater.</i> 2023, 33, 2307367                  |
| Agarose/PHEA        | 0.37         | 700        | 0.12                  | transparent  | yes          | no           | <i>ACS Appl. Mater. Interfaces</i> 2020, 12, 12, 14272-14279 |
| PACG-MBAA           | 0.156        | 65         | 4                     | transparent  | no           | no           | <i>ACS Appl. Mater. Interfaces</i> 2024, 16, 3, 4035-4044    |

|                           |       |     |     |             |     |     |                                                       |
|---------------------------|-------|-----|-----|-------------|-----|-----|-------------------------------------------------------|
| Poly<br>(MPC-co-<br>SBVI) | 0.151 | 100 | 0.7 | transparent | yes | no  | <i>Chem.<br/>Mater.</i> 2019,<br>31, 8, 2913-<br>2922 |
| PSBMA/<br>PAAm            | 1.11  | 465 | 1.3 | transparent | yes | yes | This work                                             |
